# Supplementary material
Source: publisher figshare collection journal article supplement (https://sage.figshare.com/ndownloader/files/22659821)
Supplement: Supplementary file 1 [file 22659821]

Acknowledgement

The authors would like to thank IITA Cameroon office, and the local extension service for additional logistical support and farmer mobilization. We thank Diana Lopez for support with qualitative data analysis; and Susan Ajambo and Anne Rietveld (Bioversity International) for reviewing an earlier version of this manuscript.

**Declaration of interest statement**

The authors declare that they have no competing interests.

**Author Contributions**

BAO, LN and BB conceived and designed the study. VC and EA collected data supervised by BAO and LN. BAO, LN and BB analysed the data and wrote the manuscript. All authors approved the manuscript for submission.

**Consent for publication**

All authors and institutions involved consent the submission of this manuscript.

**Ethical approval and consent to participate**

Participation in this study was fully voluntary. A consent statement was read to all participants before interactions and participants given a chance to decide to participate or not.

**Funding**

This study was funded by the BMGF under Gender-responsive Researchers Equipped for Agricultural Transformation (GREAT) project and the CGIAR Research Program on Roots, Tubers and Bananas (CRP-RTB).

**Availability of data and materials**

The datasets used for this study are available and can be submitted at any time upon publisher’s request.
